# Supplementary material for: Chemoselective Polymerization of Polar Divinyl Monomers with Rare-Earth/Phosphine Lewis Pairs
Source: MDPI journal article supplement (doi:10.3390/molecules23020360), 2018-02-08
Supplement: s1 [file s1]

# Chemoselective polymerization of polar divinyl monomers with rare-earth/phosphine Lewis pairs

Pengfei Xu <sup>1</sup>, Lei Wu <sup>1</sup>, Liqiu Dong <sup>1,2</sup> and Xin Xu <sup>1,\*</sup>

<sup>1</sup> Key Laboratory of Organic Synthesis of Jiangsu Province, College of Chemistry, Chemical Engineering and Materials Science, Soochow University, Suzhou 215123, P. R. China;

<sup>2</sup> Suzhou International Academy, BFSU, Suzhou 215200, P. R. China

\* Correspondence: xinxu@suda.edu.cn; Tel.: +86-512-65882921

## Supporting Information

### NMR data of complex 5:

<sup>1</sup>H, <sup>1</sup>H GCOSY (400 MHz / 400 MHz, CD<sub>2</sub>Cl<sub>2</sub>, 298 K): δ <sup>1</sup>H / δ <sup>1</sup>H = 7.04 / 6.50 (*m*-OAr / *p*-OAr), 5.84 / 5.08 (OCH<sub>2</sub>CH=CH<sub>2</sub> / OCH<sub>2</sub>CH=CH<sub>2</sub>), 5.84 / 4.32 (OCH<sub>2</sub>CH=CH<sub>2</sub> / OCH<sub>2</sub>CH=CH<sub>2</sub>), 2.05 / 1.25 (PCH<sub>2</sub>CH<sub>3</sub> / PCH<sub>2</sub>CH<sub>3</sub>).

<sup>1</sup>H, <sup>13</sup>C GHSQC (400 MHz / 101 MHz, CD<sub>2</sub>Cl<sub>2</sub>, 298 K): δ <sup>1</sup>H / δ <sup>13</sup>C = 7.04 / 125.1 (*m*-OAr), 6.50 / 115.8 (*p*-OAr), 5.84 / 135.6 (OCH<sub>2</sub>CH=CH<sub>2</sub>), 5.08 / 116.8 (OCH<sub>2</sub>CH=CH<sub>2</sub>), 4.32 / 68.3 (OCH<sub>2</sub>CH=CH<sub>2</sub>), 2.88 / 24.1 (CH<sub>2</sub>C=), 2.05 / 12.5 (PCH<sub>2</sub>CH<sub>3</sub>), 1.52 / 18.5 (CH<sub>3</sub>C=), 1.42 / 32.7 (C(CH<sub>3</sub>)<sub>3</sub>), 1.25 / 6.0 (PCH<sub>2</sub>CH<sub>3</sub>).

<sup>1</sup>H, <sup>13</sup>C GHMBC (400 MHz / 101 MHz, CD<sub>2</sub>Cl<sub>2</sub>, 298 K) [selected traces]: δ <sup>1</sup>H / δ <sup>13</sup>C = 7.04 / 163.4, 35.8 (*m*-OAr / *i*-OAr, C(CH<sub>3</sub>)<sub>3</sub>), 6.50 / 139.0 (*p*-OAr / *o*-OAr), 4.32 / 135.6, 116.8 (OCH<sub>2</sub>CH=CH<sub>2</sub> / OCH<sub>2</sub>CH=CH<sub>2</sub>, OCH<sub>2</sub>CH=CH<sub>2</sub>), 2.88 / 159.5, 67.2, 18.5, 12.5 (CH<sub>2</sub>C= / OC=, CH<sub>2</sub>C=, CH<sub>3</sub>C=, PCH<sub>2</sub>CH<sub>3</sub>).

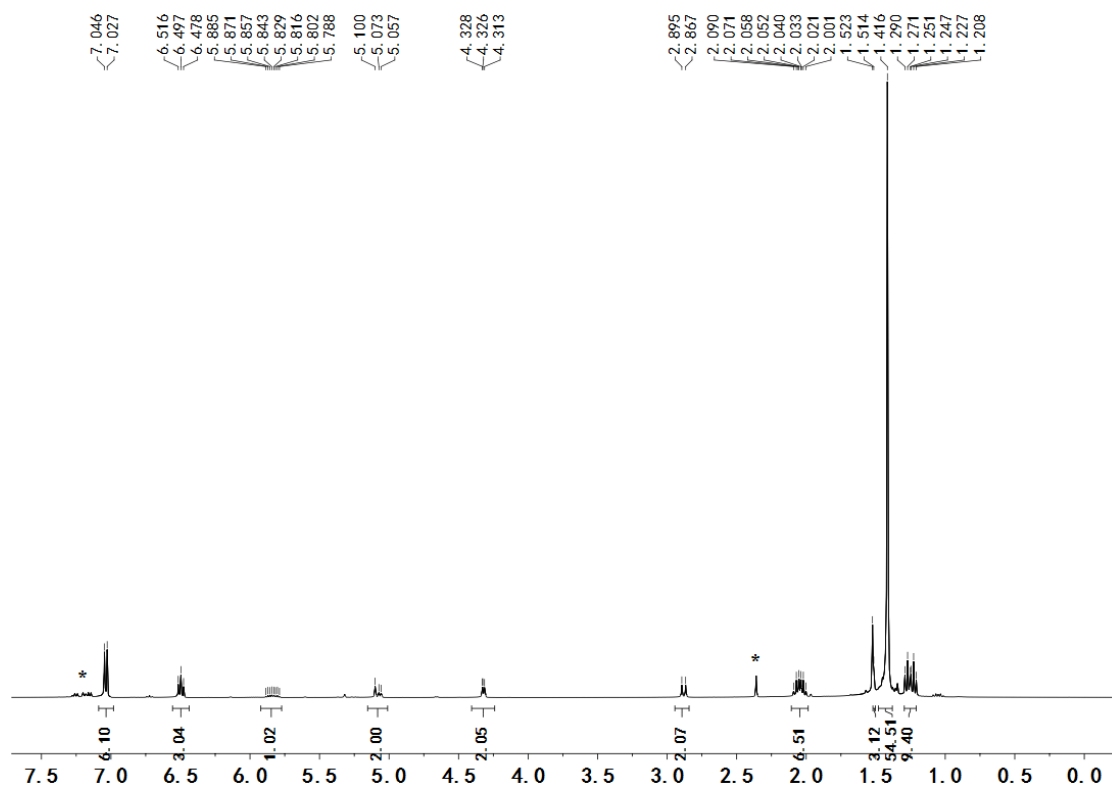

Figure S1.  $^1\text{H}$  NMR (400 MHz,  $\text{CD}_2\text{Cl}_2$ , 298 K) [\* : Toluene]

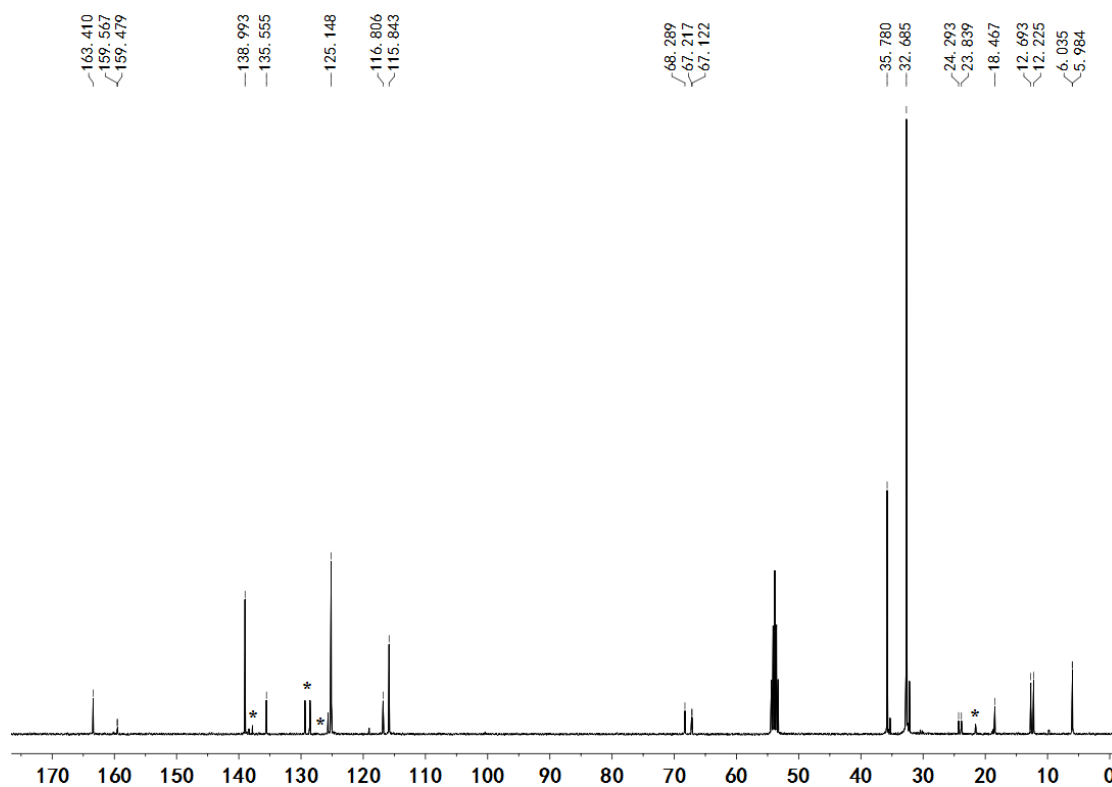

Figure S2.  $^{13}\text{C}\{^1\text{H}\}$  NMR (101 MHz,  $\text{CD}_2\text{Cl}_2$ , 298 K) [\* : Toluene]

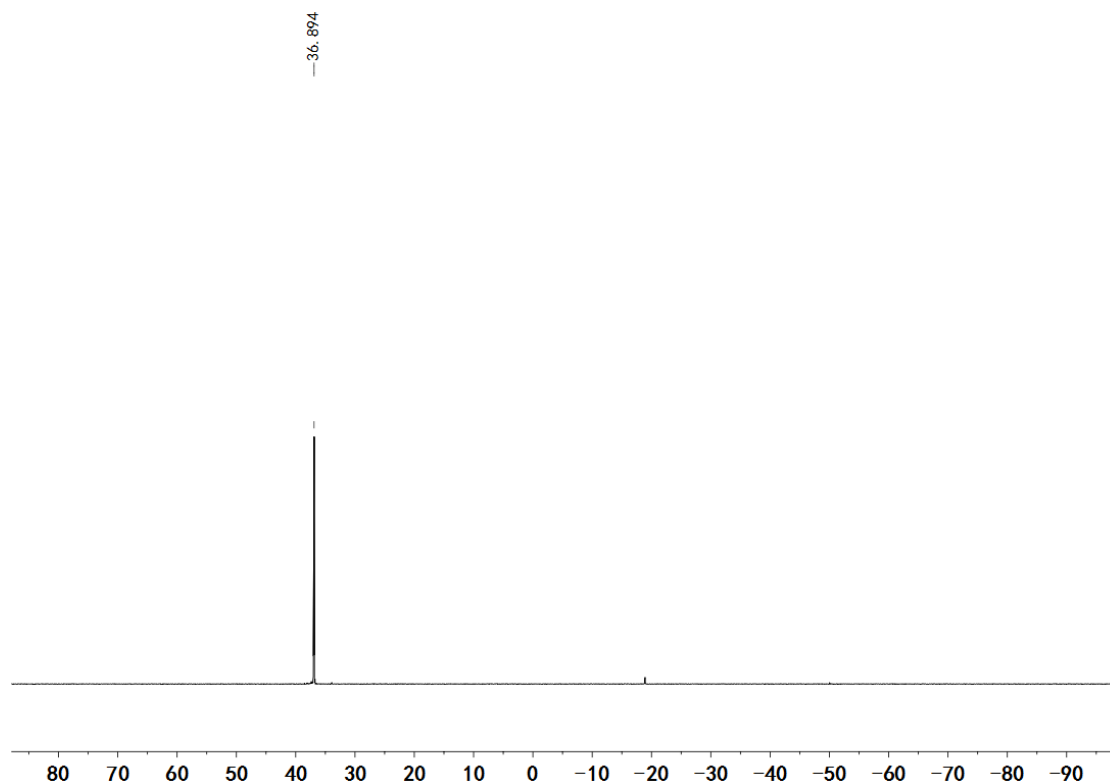

Figure S3.  $^{31}\text{P}\{^1\text{H}\}$  NMR (162 MHz,  $\text{CD}_2\text{Cl}_2$ , 298 K).

**NMR data of complex 6:**

$^1\text{H}$ ,  $^1\text{H}$  GCOSY (400 MHz / 400 MHz,  $\text{CD}_2\text{Cl}_2$ , 298 K):  $\delta\ ^1\text{H} / \delta\ ^1\text{H} = 7.05 / 6.51$  (*m*-OAr / *p*-OAr), 6.98 / 4.36, 3.99 (OCH=CH<sub>2</sub> / OCH=CH<sub>2</sub>), 2.07 / 1.28 (PCH<sub>2</sub>CH<sub>3</sub> / PCH<sub>2</sub>CH<sub>3</sub>).

$^1\text{H}$ ,  $^{13}\text{C}$  GHSQC (400 MHz / 101 MHz,  $\text{CD}_2\text{Cl}_2$ , 298 K):  $\delta\ ^1\text{H} / \delta\ ^{13}\text{C} = 7.05 / 125.1$  (*m*-OAr), 6.98 / 148.1 (OCH=CH<sub>2</sub>), 6.51 / 116.0 (*p*-OAr), 4.36, 3.99 / 89.8 (OCH=CH<sub>2</sub>), 2.90 / 23.4 (CH<sub>2</sub>C=), 2.07 / 12.4 (PCH<sub>2</sub>CH<sub>3</sub>), 1.48 / 18.2 (CH<sub>3</sub>C=), 1.41 / 32.6 (C(CH<sub>3</sub>)<sub>3</sub>), 1.28 / 6.0 (PCH<sub>2</sub>CH<sub>3</sub>).

$^1\text{H}$ ,  $^{13}\text{C}$  GHMBC (400 MHz / 101 MHz,  $\text{CD}_2\text{Cl}_2$ , 298 K) [selected traces]:  $\delta\ ^1\text{H} / \delta\ ^{13}\text{C} = 7.05 / 163.3, 35.7$  (*m*-OAr / *i*-OAr, C(CH<sub>3</sub>)<sub>3</sub>), 6.51 / 139.0 (*p*-OAr / *o*-OAr), 4.36, 3.99 / 148.1 (OCH=CH<sub>2</sub> / OCH=CH<sub>2</sub>), 2.90 / 157.3, 68.4, 18.2, 12.4 (CH<sub>2</sub>C= / OC=, CH<sub>2</sub>C=, CH<sub>3</sub>C=, PCH<sub>2</sub>CH<sub>3</sub>).

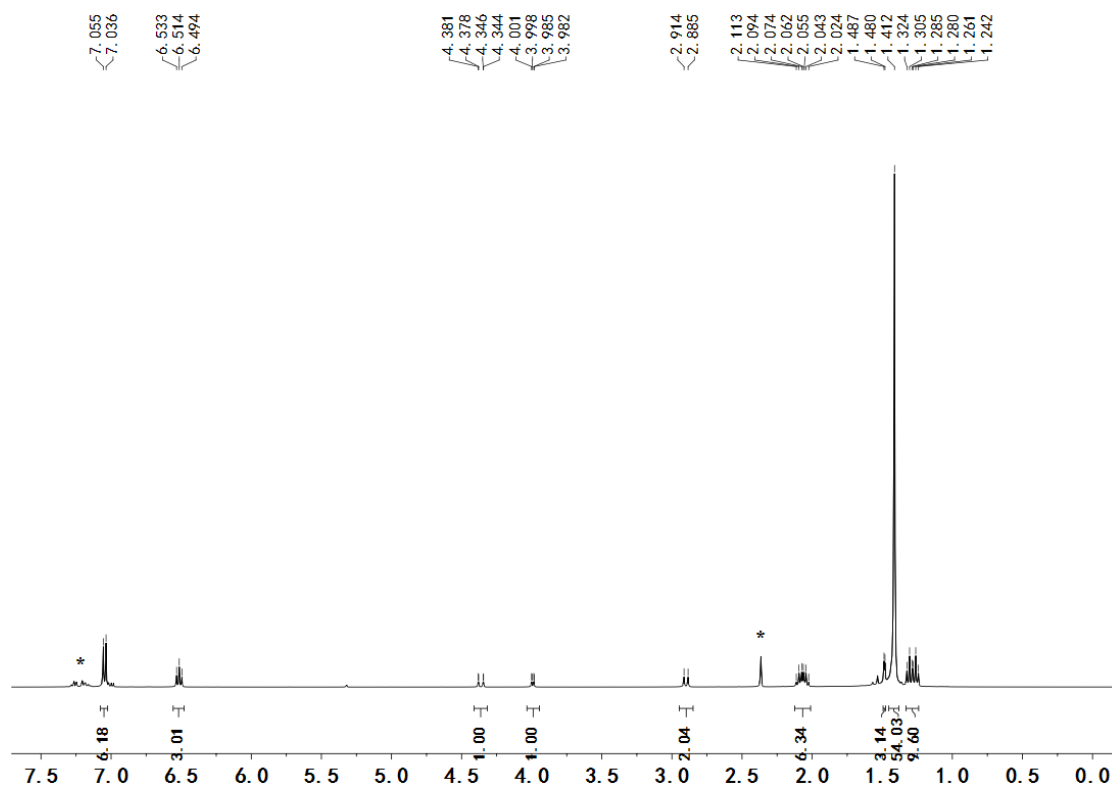

Figure S4. <sup>1</sup>H NMR (400 MHz, CD<sub>2</sub>Cl<sub>2</sub>, 298 K) [\* : Toluene]

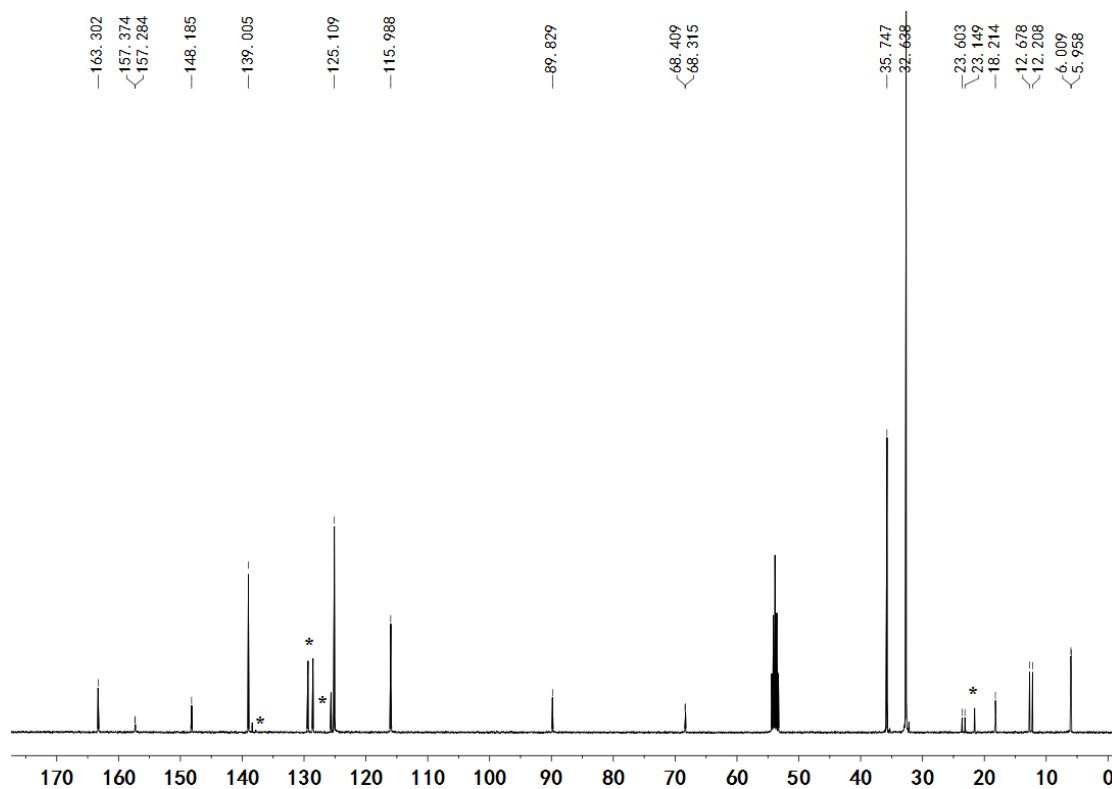

Figure S5. <sup>13</sup>C{<sup>1</sup>H} NMR (101 MHz, CD<sub>2</sub>Cl<sub>2</sub>, 298 K) [\* : Toluene]

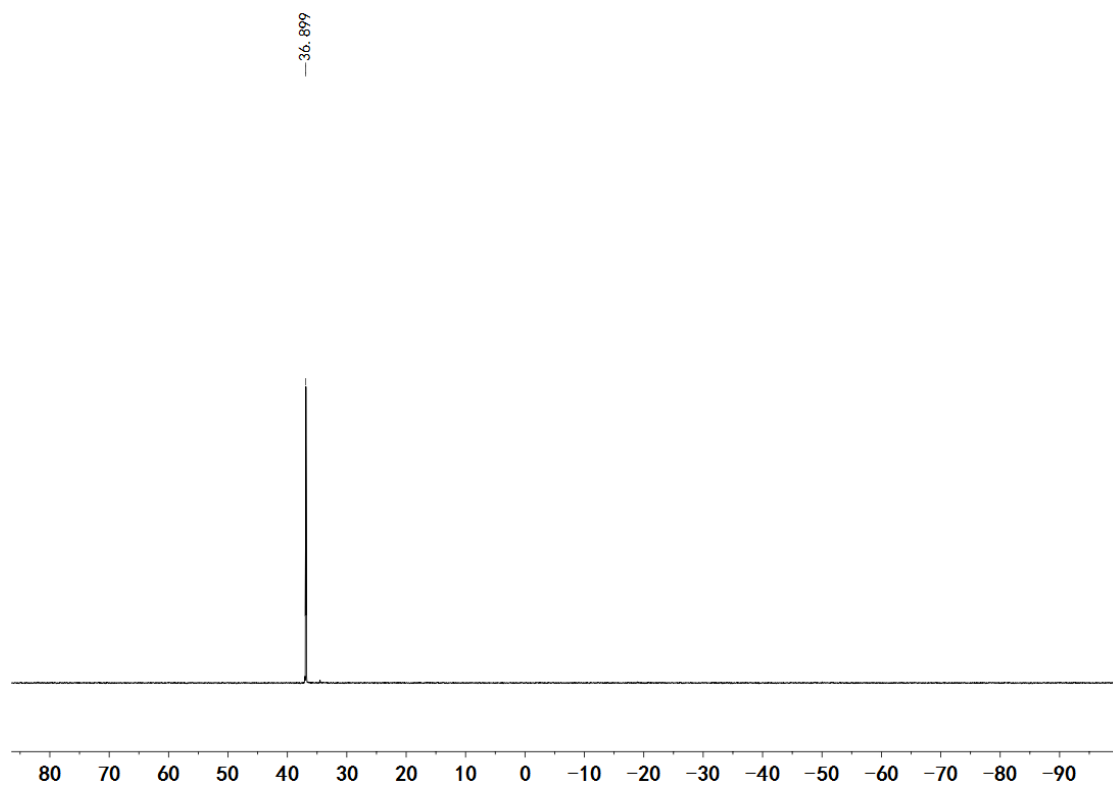

**Figure S6.**  $^{31}\text{P}\{^1\text{H}\}$  NMR (162 MHz,  $\text{CD}_2\text{Cl}_2$ , 298 K)

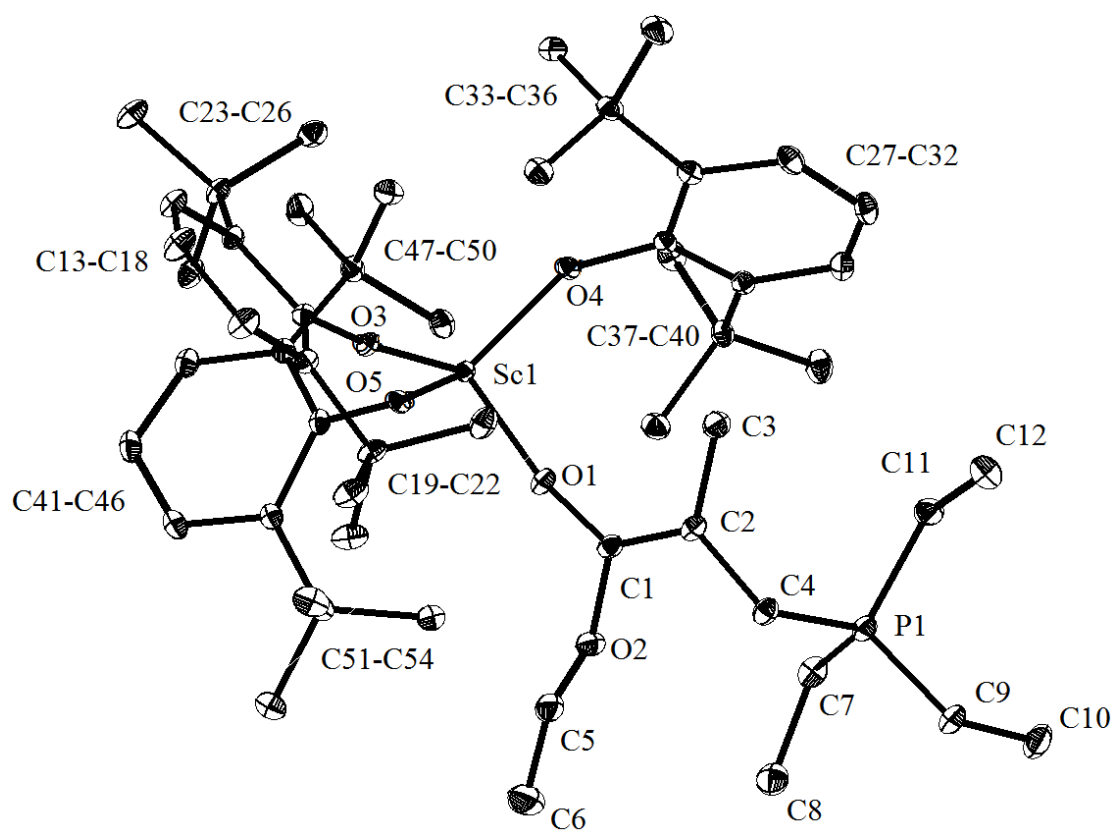

**Figure S7.** Molecular structure of complex **6**.

**Reaction of complex 1 with PEt<sub>3</sub> and AMA in 2:1:1 stoichiometric ratio.**

A Teflon-valve-sealed J. Young-type NMR tube was charged with Sc(OAr)<sub>3</sub> (26.4 mg, 0.04 mmol), AMA (2.5 mg, 0.02 mmol), and 0.3 mL of CD<sub>2</sub>Cl<sub>2</sub>. A solution of PEt<sub>3</sub> (2.4 mg, 0.02 mmol, 0.3 mL CD<sub>2</sub>Cl<sub>2</sub>) was added to this NMR tube via pipette at ambient temperature, and the colorless mixture was allowed to react for 30 min before NMR analysis, which showed the formation of complex **5** and unreacted Sc(OAr)<sub>3</sub> in a 1:1 molar ratio.

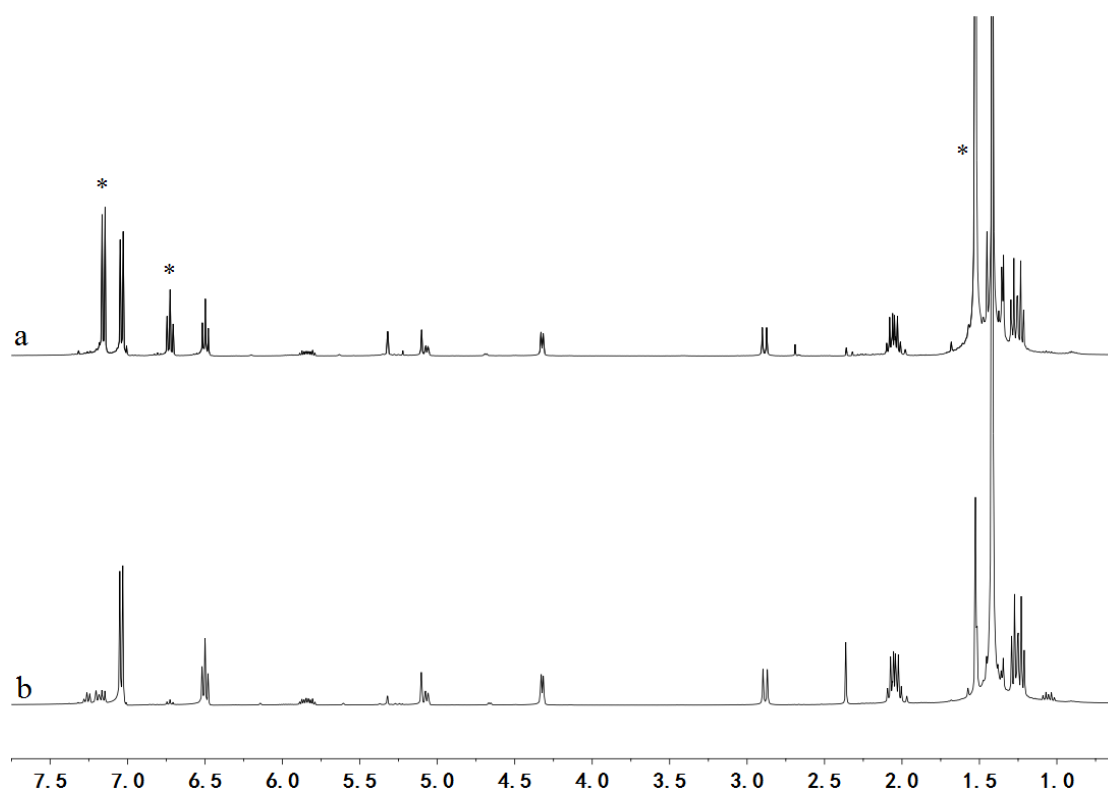

**Figure S8.** a: <sup>1</sup>H NMR (400M, CD<sub>2</sub>Cl<sub>2</sub>, 298 K) of reaction of complex **1** with PEt<sub>3</sub> and AMA in 2:1:1 stoichiometric ratio. [\* : complex **1**]; b: <sup>1</sup>H NMR (400M, CD<sub>2</sub>Cl<sub>2</sub>, 298 K) of complex **5**.

**Reaction of complex 1 with PEt<sub>3</sub> and VMA in 2:1:1 stoichiometric ratio.**

Following the procedure described for AMA, reaction of Sc(OAr)<sub>3</sub> (26.4 mg, 0.04 mmol), VMA (2.2 mg, 0.02 mmol), and PEt<sub>3</sub> (2.4 mg, 0.02 mmol) showed the formation of complex **6** and unreacted Sc(OAr)<sub>3</sub> in a 1:1 molar ratio.

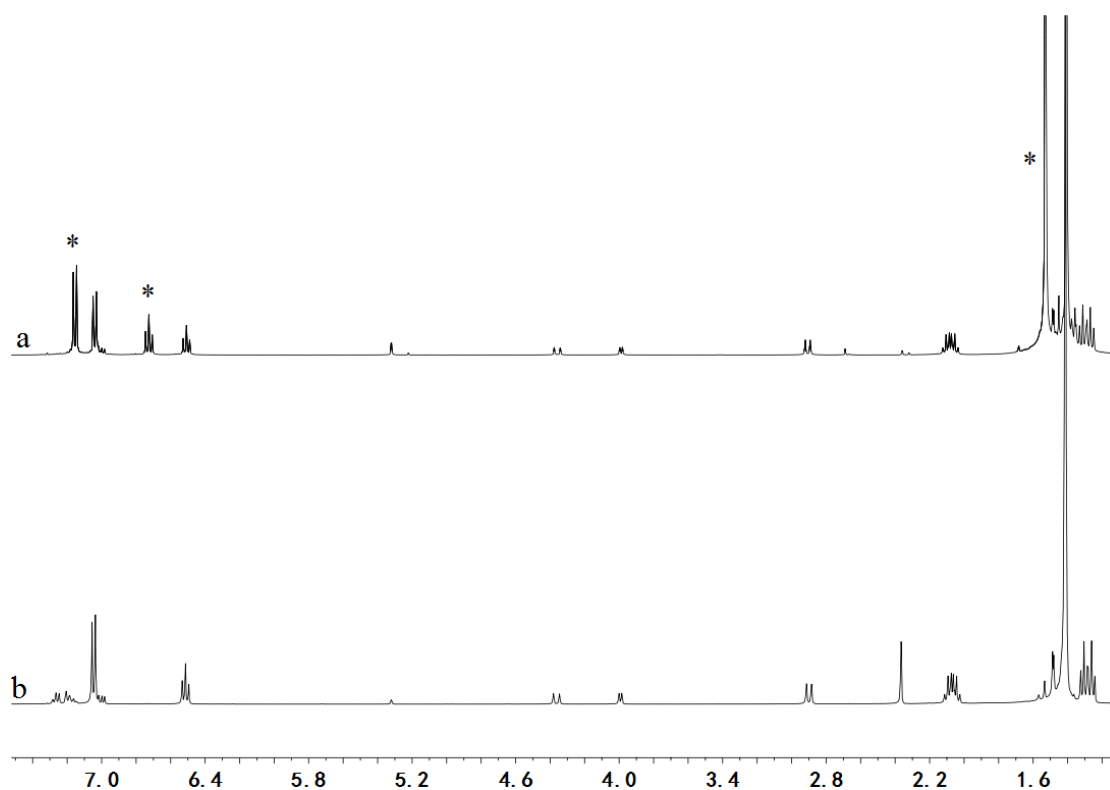

**Figure S9.** a:  $^1\text{H}$  NMR (400M,  $\text{CD}_2\text{Cl}_2$ , 298 K) of reaction of complex **1** with  $\text{PEt}_3$  and VMA in 2:1:1 stoichiometric ratio. [\* : complex **1**]; b:  $^1\text{H}$  NMR (400M,  $\text{CD}_2\text{Cl}_2$ , 298 K) of complex **6**.

**Table S1.** Results of chemoselective polymerization of polar divinyl monomers with homoleptic rare-earth aryloxides based LPs.<sup>a</sup>

| Entry          | Monomer | LA       | LB             | [M]/[LB] | t<br>[min] | Conv.<br>[%] | $M_n$<br>[ $10^4$<br>g/mol] | PDI<br>[ $M_w/M_n$ ] | <i>rr</i><br>[%] | <i>mr</i><br>[%] | <i>mm</i><br>[%] |
|----------------|---------|----------|----------------|----------|------------|--------------|-----------------------------|----------------------|------------------|------------------|------------------|
| 1              | AMA     | <b>1</b> | $\text{PPh}_3$ | 200      | 1440       | 0            | -                           | -                    | -                | -                | -                |
| 2 <sup>b</sup> | AMA     | <b>1</b> | $\text{PPh}_3$ | 200      | 1440       | 0            | -                           | -                    | -                | -                | -                |
| 3              | AMA     | <b>1</b> | $\text{PCy}_3$ | 200      | 25         | 100          | 12.3                        | 1.33                 | 79.8             | 19.6             | 0.6              |
| 4              | AMA     | <b>1</b> | $\text{PEt}_3$ | 200      | 15         | 100          | 5.03                        | 1.23                 | 79.9             | 19.5             | 0.6              |
| 5 <sup>b</sup> | AMA     | <b>1</b> | $\text{PEt}_3$ | 200      | 40         | 100          | 5.20                        | 1.40                 | 80.2             | 18.9             | 0.9              |
| 6 <sup>c</sup> | AMA     | <b>1</b> | $\text{PEt}_3$ | 200      | 1440       | 75           | 10.8                        | 1.38                 | 87.8             | 11.4             | 0.8              |
| 7              | AMA     | <b>1</b> | $\text{PMe}_3$ | 200      | 30         | 90           | 5.09                        | 1.23                 | 79.2             | 20.0             | 0.8              |
| 8              | AMA     | <b>2</b> | $\text{PEt}_3$ | 200      | 3          | 100          | 8.57                        | 1.41                 | 75.3             | 23.5             | 1.2              |
| 9              | AMA     | <b>3</b> | $\text{PEt}_3$ | 200      | 1          | 100          | 9.16                        | 1.34                 | 75.0             | 23.7             | 1.7              |
| 10             | AMA     | <b>4</b> | $\text{PEt}_3$ | 200      | <1         | 100          | 10.0                        | 1.42                 | 72.5             | 26.0             | 1.5              |

|                 |      |          |                  |     |      |     |      |      |      |      |     |
|-----------------|------|----------|------------------|-----|------|-----|------|------|------|------|-----|
| 11              | AMA  | <b>4</b> | PEt <sub>3</sub> | 400 | 5    | 100 | 15.3 | 1.76 | 72.8 | 25.4 | 1.8 |
| 12              | AMA  | <b>1</b> | -                | 200 | 1440 | 0   | -    | -    | -    | -    | -   |
| 13              | AMA  | <b>4</b> | -                | 200 | 1440 | 0   | -    | -    | -    | -    | -   |
| 14              | VMA  | <b>1</b> | PEt <sub>3</sub> | 100 | 10   | 100 | 5.62 | 1.36 | 75.6 | 22.6 | 1.8 |
| 15              | VMA  | <b>1</b> | PMe <sub>3</sub> | 100 | 10   | 100 | 7.59 | 1.31 | 76.8 | 21.6 | 1.6 |
| 16              | VMA  | <b>4</b> | PEt <sub>3</sub> | 100 | 1    | 100 | 4.74 | 1.76 | 69.3 | 29.1 | 1.6 |
| 17 <sup>b</sup> | VMA  | <b>4</b> | PEt <sub>3</sub> | 100 | 1    | 100 | 6.08 | 1.43 | 70.1 | 28.7 | 1.2 |
| 18              | VMA  | <b>1</b> | -                | 100 | 1440 | 0   | -    | -    | -    | -    | -   |
| 19              | VMA  | <b>4</b> | -                | 100 | 1440 | 0   | -    | -    | -    | -    | -   |
| 20              | VBMA | <b>1</b> | PEt <sub>3</sub> | 100 | 45   | 100 | 2.55 | 1.87 | 75.0 | 22.5 | 2.5 |
| 21 <sup>b</sup> | VBMA | <b>1</b> | PEt <sub>3</sub> | 100 | 90   | 100 | 2.34 | 1.73 | 76.1 | 20.7 | 3.2 |
| 22              | VBMA | <b>1</b> | PMe <sub>3</sub> | 100 | 45   | 100 | 2.42 | 1.99 | 76.2 | 22.8 | 1.0 |
| 23 <sup>b</sup> | VBMA | <b>1</b> | PMe <sub>3</sub> | 100 | 90   | 100 | 2.87 | 2.04 | 76.2 | 21.3 | 2.5 |
| 24              | VBMA | <b>4</b> | PEt <sub>3</sub> | 100 | 5    | 100 | 2.92 | 2.00 | 72.1 | 26.3 | 1.6 |
| 25 <sup>b</sup> | VBMA | <b>4</b> | PEt <sub>3</sub> | 100 | 1440 | 0   | -    | -    | -    | -    | -   |
| 26              | VBMA | <b>1</b> | -                | 100 | 1440 | 0   | -    | -    | -    | -    | -   |
| 27              | VBMA | <b>4</b> | -                | 100 | 1440 | 0   | -    | -    | -    | -    | -   |
| 28 <sup>b</sup> | AMA  | <b>5</b> | -                | 100 | 1440 | 32  | 2.12 | 1.45 | 75.3 | 21.5 | 3.2 |
| 29 <sup>d</sup> | AMA  | <b>5</b> | -                | 100 | 20   | 100 | 4.23 | 1.42 | 78.4 | 19.6 | 2.0 |
| 30 <sup>b</sup> | VMA  | <b>6</b> | -                | 100 | 1440 | 0   | -    | -    | -    | -    | -   |
| 31 <sup>d</sup> | VMA  | <b>6</b> | -                | 100 | 20   | 100 | 4.89 | 1.42 | 77.4 | 21.7 | 0.9 |

<sup>a</sup>Conditions: polymerizations were conducted at room temperature in toluene ( $V_{\text{monomer}}/V_{\text{solvent}}$ : 1:2) and a LA/LB ratio of 2, where  $n_{[\text{LA}]}$  = 40  $\mu\text{mol}$ . Monomer conversions were determined by <sup>1</sup>H NMR spectroscopy and confirmed by gravimetric methods, *rr*, *mr*, *mm* measured by <sup>1</sup>H NMR spectroscopy.  $M_n$  and PDI were determined by GPC in DMF relative to PMMA standards. <sup>b</sup>Polymerization was conducted in CH<sub>2</sub>Cl<sub>2</sub>. <sup>c</sup>Polymerization was conducted at -30 °C. <sup>d</sup>Polymerization was conducted in CH<sub>2</sub>Cl<sub>2</sub> in the presence of 1 equiv. **1**.



**Procedure for the post-functionalization of PVBMA:** AIBN (55 mg, 0.33 mmol) was added to a solution of PVBMA (202 mg) and PhCH<sub>2</sub>SH (5 g, 40 mmol) in 15 mL of THF. After stirring for 24 h at 70°C, the reaction mixture was filtered and the volatiles were removed under reduced pressure. The produced crude product was further purified by precipitation in THF/petroleum ether mixture and then dried in a vacuum oven at 50 °C overnight to a constant weight.

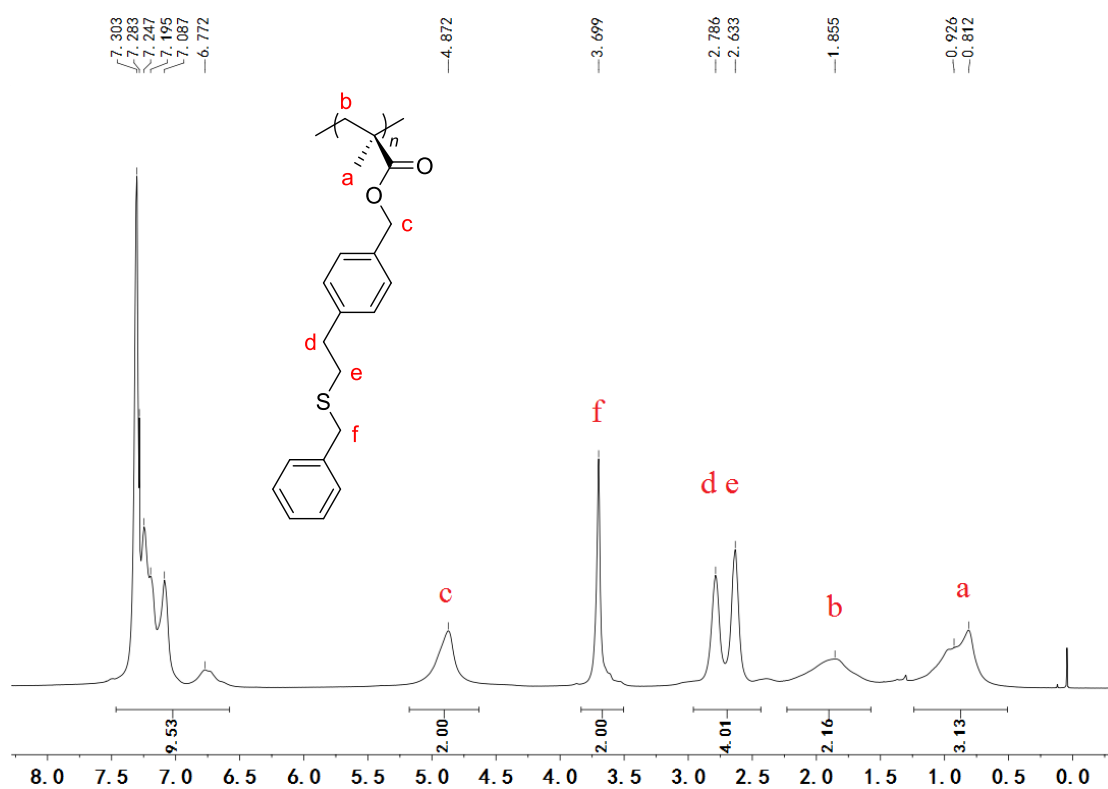

**Figure S10.**

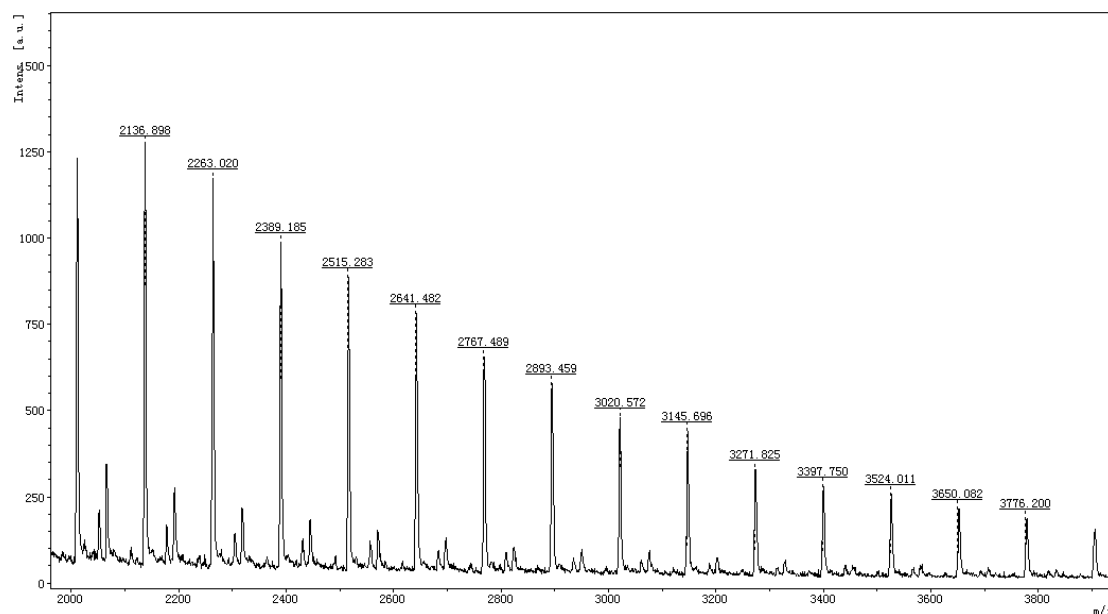

**Figure S11.** MALDI-TOF MS spectrum of low molecular weight AMA oligomers produced by **1**/PEt<sub>3</sub> at RT with [M]/[LB] = 20:1.

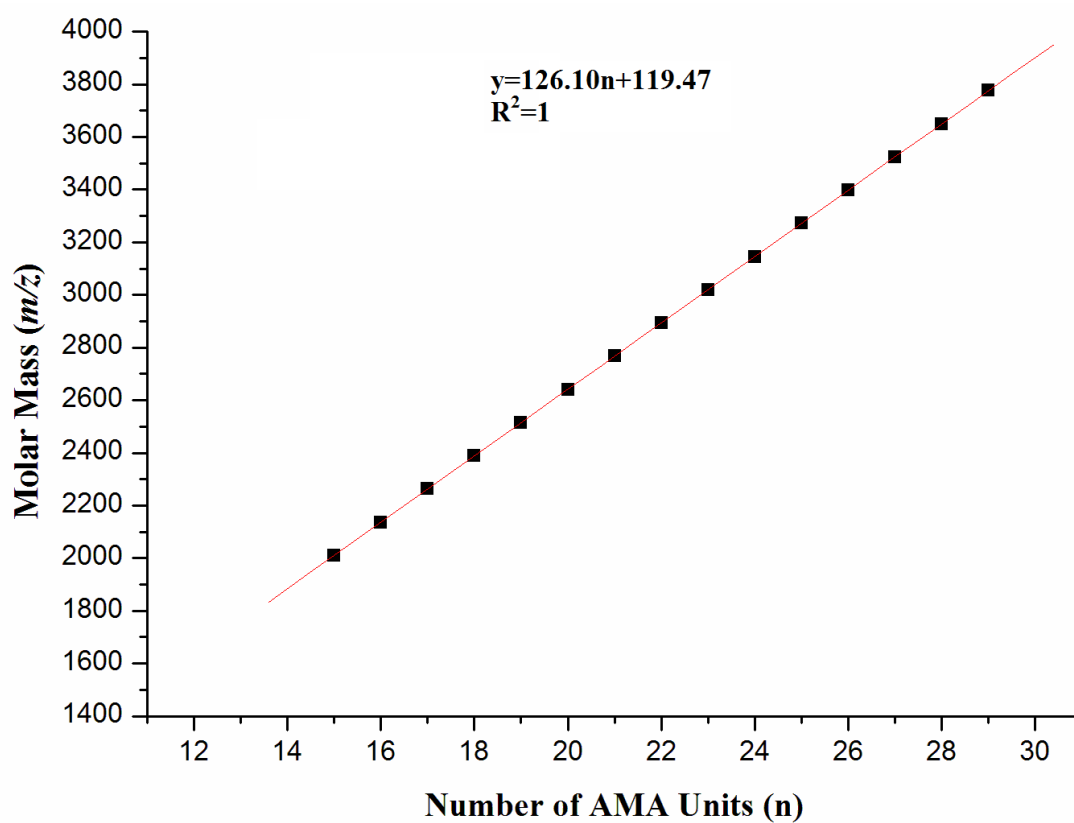

**Figure S12.** Plot of  $m/z$  values vs the number of AMA repeat units ( $n$ ).

**$^1\text{H}$  NMR spectra of PAMA:**

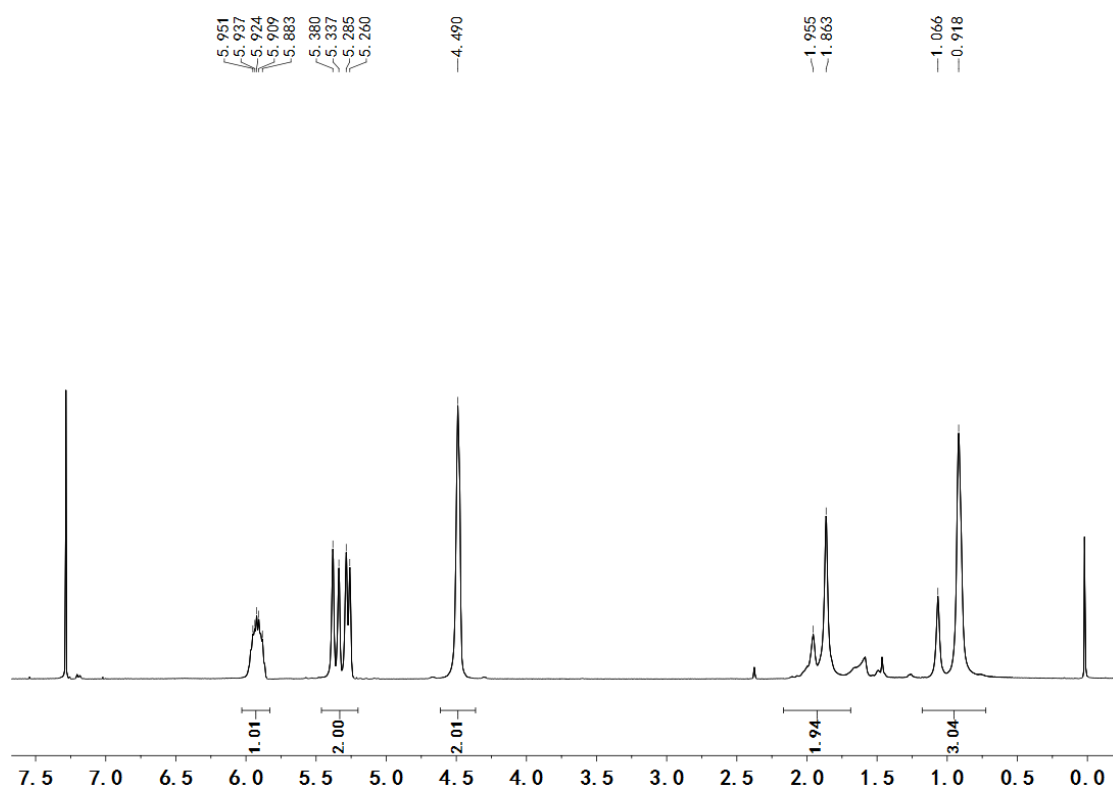

**Figure S13.**  $^1\text{H}$  NMR (400M,  $\text{CDCl}_3$ , 298 K) of the PAMA produced by the **1**/ $\text{PET}_3$  pair in toluene at RT with  $[\text{AMA}]/[\text{PET}_3] = 200:1$ . ( $rr = 79.9\%$ )

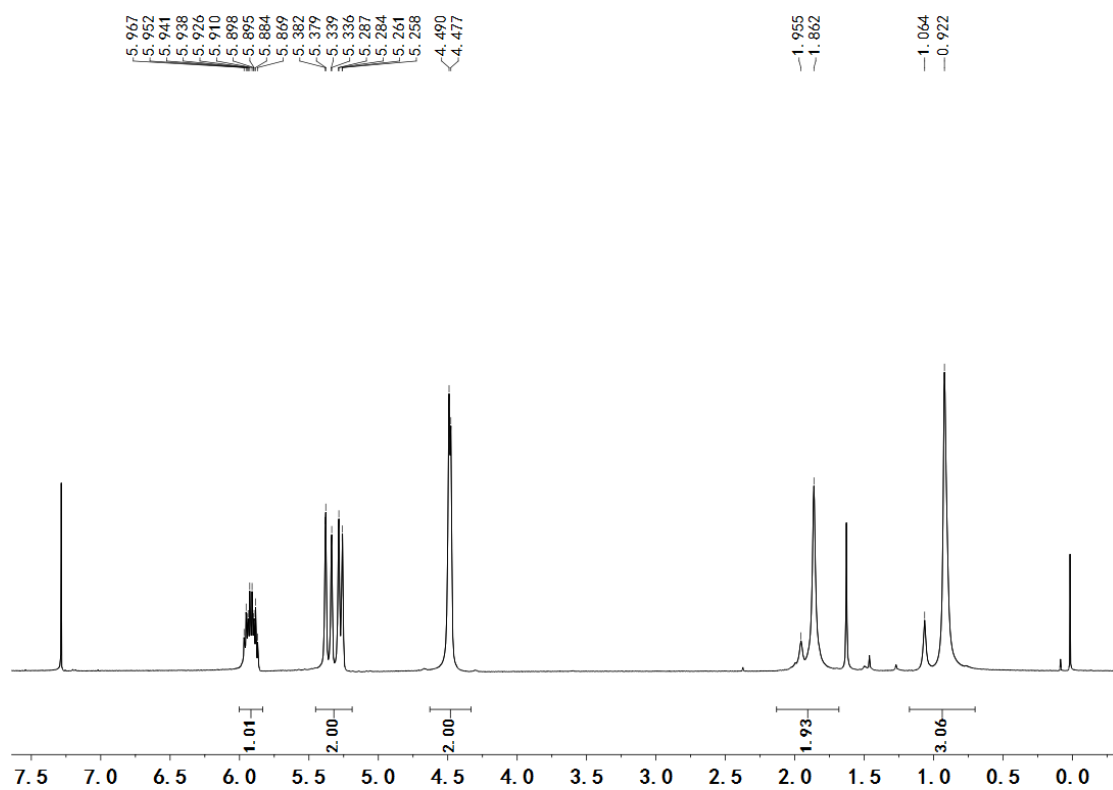

**Figure S14.**  $^1\text{H}$  NMR (400M,  $\text{CDCl}_3$ , 298 K) of the PAMA produced by the **1**/ $\text{PET}_3$  pair in toluene at RT with  $[\text{AMA}]/[\text{PET}_3] = 200:1$ .

pair in toluene at -30°C with [AMA]/[PEt<sub>3</sub>] = 200:1. (*rr* = 87.8%)

**<sup>1</sup>H NMR spectra of PVMA:**

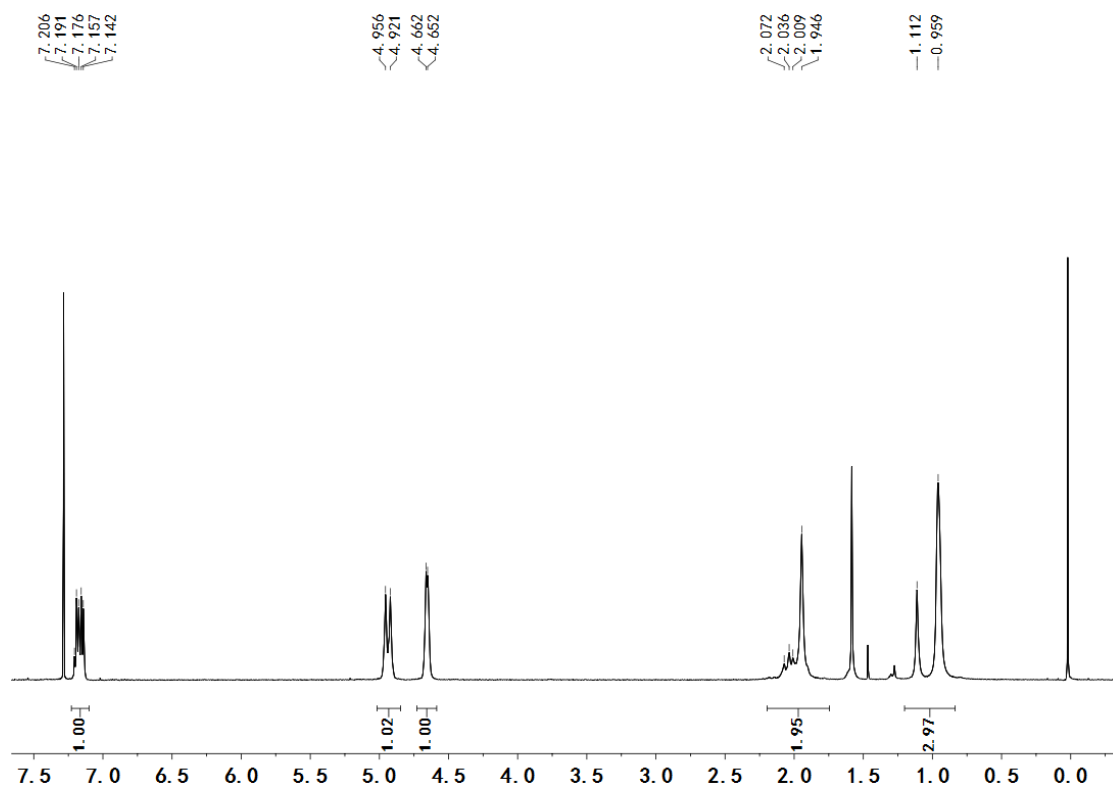

**Figure S15.** <sup>1</sup>H NMR (400M, CDCl<sub>3</sub>, 298 K) of the PVMA produced by the **1**/PEt<sub>3</sub> pair in toluene at RT with [VMA]/[PEt<sub>3</sub>] = 100:1. (*rr* = 75.6%)

**$^1\text{H}$  NMR spectra of PVBMA:**

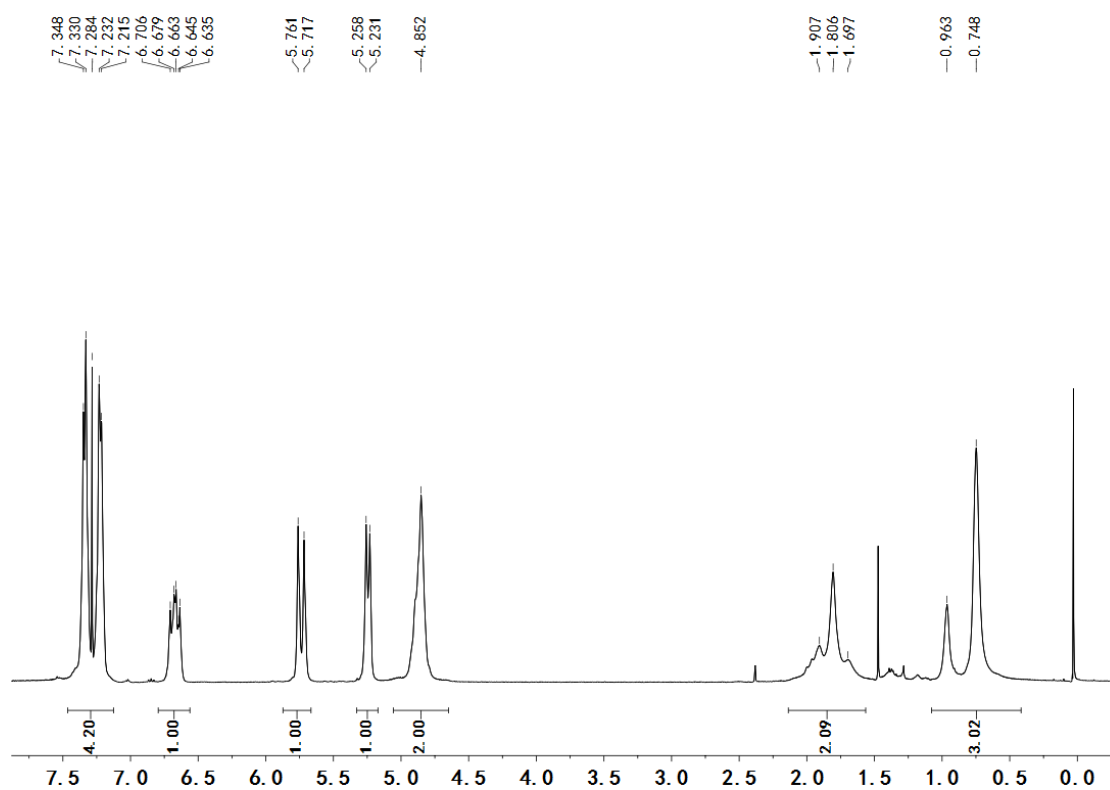

**Figure S16.**  $^1\text{H}$  NMR (400M,  $\text{CDCl}_3$ , 298 K) of the PVBMA produced by the **4**/ $\text{PEt}_3$  pair in toluene at RT with  $[\text{VBMA}]/[\text{PEt}_3] = 100:1$ . ( $rr = 72.1\%$ )

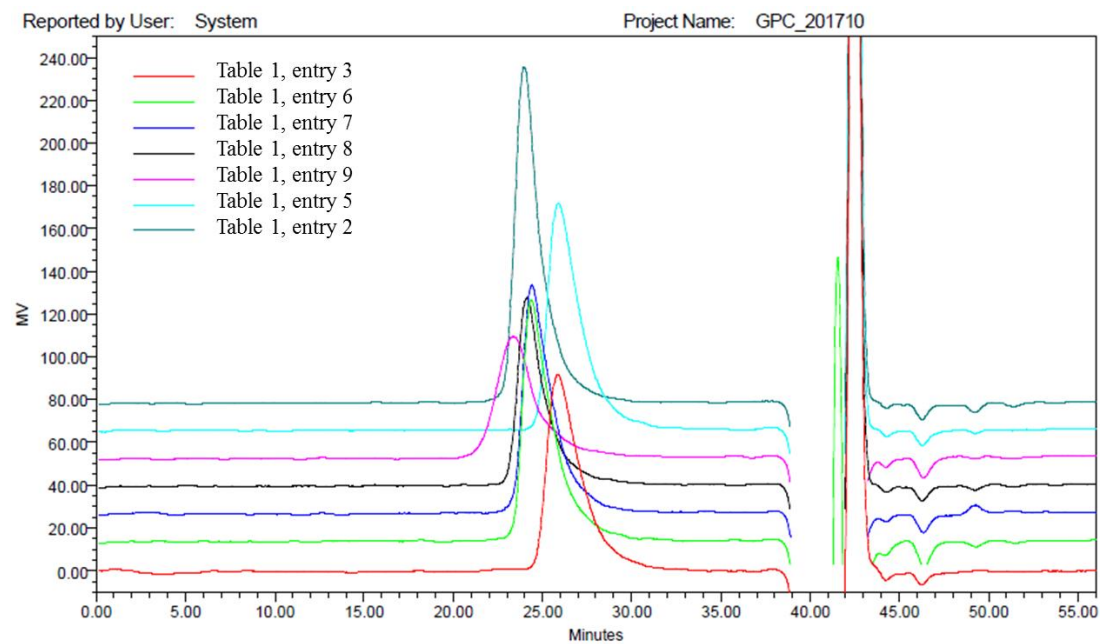

**Figure S17.** Typical GPC curves of current polymerization.
